# Supplementary material for: Publication of inspection frameworks: a qualitative study exploring the impact on quality improvement and regulation in three healthcare settings
Source: PubMed Central journal article supplement (PMC8461449; doi:10.1136/bmjqs-2020-011337), 2020-12-02
Supplement: bmjqs-2020-011337supp001.pdf [file bmjqs-2020-011337supp001.pdf]

## Appendix A. Topic list interviews inspection frameworks

### (1) Knowledge of and attitude towards frameworks

- Awareness of the inspection frameworks, how did people become aware of the framework
- Accessibility and comprehensibility of the inspection framework
- Agreement with the included standards in the framework

### (2) Use of the framework in practice

- Internal and external mechanisms that contribute to the adoption and use of an inspection framework
- Experiences with the framework during inspections

### (3) Consequences/influence on compliance to norms and quality work

- In what ways does the organization steer quality processes and what role does an inspection framework and the healthcare inspectorate has in this
- Consequences of publication on healthcare professional/provider
- Consequences of publication on inspector and inspections
- Role of characteristics of the inspection framework, such as open/closed standards, understandability, accessibility

### (4) Interaction between stakeholders and inspectorate

- Involvement of stakeholders in development of the inspection framework
- Communication and interaction between stakeholders after publication of the framework
- Relation between the healthcare sector and stakeholders and the inspectorate and inspectors
